# Supplementary material for: Evaluation of Out-of-Pocket Costs and Treatment Intensification With an SGLT2 Inhibitor or GLP-1 RA in Patients With Type 2 Diabetes and Cardiovascular Disease
Source: PubMed Central journal article supplement (PMC10261995; doi:10.1001/jamanetworkopen.2023.17886), 2023-06-12
Supplement: jamanetwopen-e2317886-s001.pdf [file jamanetwopen-e2317886-s001.pdf]

## Supplemental Online Content

Luo J, Feldman R, Callaway Kim K, et al. Evaluation of out-of-pocket costs and treatment intensification with a sodium glucose cotransporter 2 inhibitor or glucagon-like peptide-1 receptor agonist in patients with type 2 diabetes and cardiovascular disease. *JAMA Netw Open*. 2023;6(6):e2317886. doi:10.1001/jamanetworkopen.2023.17886

**eTable 1.** *ICD-9-CM, ICD-10-CM* Diagnostic and Procedure Codes Used to Define Prevalent Atherosclerotic Cardiovascular Disease

**eTable 2.** Full Cox Proportional Hazards Model Output, Model #1

**eTable 3.** Full Cox Proportional Hazards Model Output, Model #2

**eTable 4.** Full Cox Proportional Hazards Model Output, Model #3

**eTable 5.** Full Cox Proportional Hazards Model Output, Model #4

**eTable 6.** Full Cox Proportional Hazards Model Output, Model #5

**eTable 7.** Full Cox Proportional Hazards Model Output, Model #6

**eFigure 1.** Cumulative Incidence Curve for Statin Initiation Stratified by Q1 Through Q4 of OOP Costs for GLP-1 RA

**eFigure 2.** Cumulative Incidence Curve for Statin Initiation Stratified by Q1 Through Q4 of OOP Costs for SGLT2 Inhibitors

**eTable 8.** Hazard Ratio of Initiating a Statin Comparing the Highest vs the Lowest Quartile of OOP Costs for GLP-1 Receptor Agonists or SGLT2 Inhibitors

This supplemental material has been provided by the authors to give readers additional information about their work.

**eTable 1.** ICD-9-CM, ICD-10-CM diagnostic and procedure codes used to define prevalent atherosclerotic cardiovascular disease (ASCVD).

| Diagnosis                               | Codes   | Description | Codes                                                                                                                                                                                                                                                                                                                                                                                                                                                                                                                                                                                                                                                                                                                                                                                                                                                                                                                                                                                                                                                                                                                                                                                                                                                                                                                                                                                                                                                                                                   | Validation Study                                           |
|-----------------------------------------|---------|-------------|---------------------------------------------------------------------------------------------------------------------------------------------------------------------------------------------------------------------------------------------------------------------------------------------------------------------------------------------------------------------------------------------------------------------------------------------------------------------------------------------------------------------------------------------------------------------------------------------------------------------------------------------------------------------------------------------------------------------------------------------------------------------------------------------------------------------------------------------------------------------------------------------------------------------------------------------------------------------------------------------------------------------------------------------------------------------------------------------------------------------------------------------------------------------------------------------------------------------------------------------------------------------------------------------------------------------------------------------------------------------------------------------------------------------------------------------------------------------------------------------------------|------------------------------------------------------------|
| Stroke/TIA<br>(Cerebrovascular Disease) | 9       | Regex       | "^43[0-8]"                                                                                                                                                                                                                                                                                                                                                                                                                                                                                                                                                                                                                                                                                                                                                                                                                                                                                                                                                                                                                                                                                                                                                                                                                                                                                                                                                                                                                                                                                              |                                                            |
|                                         | 10      |             | "^I63", "^G45[.]9"                                                                                                                                                                                                                                                                                                                                                                                                                                                                                                                                                                                                                                                                                                                                                                                                                                                                                                                                                                                                                                                                                                                                                                                                                                                                                                                                                                                                                                                                                      |                                                            |
| Unstable Angina                         | 9       | Regex       | 411.1                                                                                                                                                                                                                                                                                                                                                                                                                                                                                                                                                                                                                                                                                                                                                                                                                                                                                                                                                                                                                                                                                                                                                                                                                                                                                                                                                                                                                                                                                                   |                                                            |
|                                         | 10      |             | I20.0                                                                                                                                                                                                                                                                                                                                                                                                                                                                                                                                                                                                                                                                                                                                                                                                                                                                                                                                                                                                                                                                                                                                                                                                                                                                                                                                                                                                                                                                                                   |                                                            |
| Peripheral Artery Disease               | 9       | Exact       | "250.70"                                                                                                                                                                                                                                                                                                                                                                                                                                                                                                                                                                                                                                                                                                                                                                                                                                                                                                                                                                                                                                                                                                                                                                                                                                                                                                                                                                                                                                                                                                |                                                            |
|                                         | 10      | Regex       | "^E11[.]5", "^E13[.]5"                                                                                                                                                                                                                                                                                                                                                                                                                                                                                                                                                                                                                                                                                                                                                                                                                                                                                                                                                                                                                                                                                                                                                                                                                                                                                                                                                                                                                                                                                  |                                                            |
| CAD/CABG/PCI                            | 9 or 10 | Regex       | <p><u>Codes for myocardial infarction:</u><br/>           ICD-9 diagnosis codes<br/>           '41000', '41001', '41002', '41010', '41011', '41012', '41020', '41021', '41022', '41030', '41031', '41032', '41040', '41041', '41042', '41050', '41051', '41052', '41060', '41061', '41062', '41070', '41071', '41072', '41080', '41081', '41082', '41090', '41091', '41092', '412'</p> <p>-or-</p> <p>ICD-10 diagnosis codes<br/>           'I2101', 'I2102', 'I2109', 'I2111', 'I2119', 'I2121', 'I2129', 'I213', 'I214', 'I220', 'I221', 'I222', 'I228', 'I229', 'I252'</p> <p><u>Codes for CABG:</u><br/>           ICD-9 diagnosis code 'V4581'<br/>           or<br/>           ICD-10 diagnosis code 'Z951'<br/>           or<br/>           ICD-9 procedure codes '3610', '3611', '3612', '3613', '3614', '3615', '3616', '3617', '3619'<br/>           or<br/>           ICD-10 procedure codes '0210093', '0210098', '0210099', '021009C', '021009F', '021009W', '02100A3', '02100A8', '02100A9', '02100AC', '02100AF', '02100AW', '02100J3', '02100J8', '02100J9', '02100JC', '02100JF', '02100JW', '02100K3', '02100K8', '02100K9', '02100KC', '02100KF', '02100KW', '02100Z3', '02100Z8', '02100Z9', '02100ZC', '02100ZF', '0210344', '02103D4', '0210444', '0210493', '0210498', '0210499', '021049C', '021049F', '021049W', '02104A3', '02104A8', '02104A9', '02104AC', '02104AF', '02104AW', '02104D4', '02104J3', '02104J8', '02104J9', '02104JC', '02104JF', '02104JW', '02104K3',</p> | Fishman et al., Contemporary Clinical Communications, 2018 |

|  |  |  |                                                                                                                                                                                                                                                                                                                                                                                                                                                                                                                                                                                                                                                                                                                                                                                                                                                                                                                                                                                                                                                                                                                                                                                                                                                                                                                                                                                                                                                                                                                                                                                                                                                                                                                                                                                                                                                                                                                                                                                                                                                                                                                                                                                                                                                                                                                                                                                                                                                             |  |
|--|--|--|-------------------------------------------------------------------------------------------------------------------------------------------------------------------------------------------------------------------------------------------------------------------------------------------------------------------------------------------------------------------------------------------------------------------------------------------------------------------------------------------------------------------------------------------------------------------------------------------------------------------------------------------------------------------------------------------------------------------------------------------------------------------------------------------------------------------------------------------------------------------------------------------------------------------------------------------------------------------------------------------------------------------------------------------------------------------------------------------------------------------------------------------------------------------------------------------------------------------------------------------------------------------------------------------------------------------------------------------------------------------------------------------------------------------------------------------------------------------------------------------------------------------------------------------------------------------------------------------------------------------------------------------------------------------------------------------------------------------------------------------------------------------------------------------------------------------------------------------------------------------------------------------------------------------------------------------------------------------------------------------------------------------------------------------------------------------------------------------------------------------------------------------------------------------------------------------------------------------------------------------------------------------------------------------------------------------------------------------------------------------------------------------------------------------------------------------------------------|--|
|  |  |  | <p>'02104K8', '02104K9', '02104KC', '02104KF', '02104KW',<br/> '02104Z3', '02104Z8', '02104Z9', '02104ZC', '02104ZF',<br/> '0211093', '0211098', '0211099', '021109C', '021109F',<br/> '021109W', '02110A3', '02110A8', '02110A9', '02110AC',<br/> '02110AF', '02110AW', '02110J3', '02110J8', '02110J9',<br/> '02110JC', '02110JF', '02110JW', '02110K3', '02110K8',<br/> '02110K9', '02110KC', '02110KF', '02110KW', '02110Z3',<br/> '02110Z8', '02110Z9', '02110ZC', '02110ZF', '0211344',<br/> '02113D4', '0211444', '0211493', '0211498', '0211499',<br/> '021149C', '021149F', '021149W', '02114A3', '02114A8',<br/> '02114A9', '02114AC', '02114AF', '02114AW',<br/> '02114D4', '02114J3', '02114J8', '02114J9', '02114JC',<br/> '02114JF', '02114JW', '02114K3', '02114K8', '02114K9',<br/> '02114KC', '02114KF', '02114KW', '02114Z3', '02114Z8',<br/> '02114Z9', '02114ZC', '02114ZF', '0212093', '0212098',<br/> '0212099', '021209C', '021209F', '021209W', '02120A3',<br/> '02120A8', '02120A9', '02120AC', '02120AF', '02120AW',<br/> '02120J3', '02120J8', '02120J9', '02120JC', '02120JF',<br/> '02120JW', '02120K3', '02120K8', '02120K9', '02120KC',<br/> '02120KF', '02120KW', '02120Z3', '02120Z8', '02120Z9',<br/> '02120ZC', '02120ZF', '0212344', '02123D4', '0212444',<br/> '0212493', '0212498', '0212499', '021249C', '021249F',<br/> '021249W', '02124A3', '02124A8', '02124A9', '02124AC',<br/> '02124AF', '02124AW', '02124D4', '02124J3', '02124J8',<br/> '02124J9', '02124JC', '02124JF', '02124JW', '02124K3',<br/> '02124K8', '02124K9', '02124KC', '02124KF', '02124KW',<br/> '02124Z3', '02124Z8', '02124Z9', '02124ZC', '02124ZF',<br/> '0213093', '0213098', '0213099', '021309C', '021309F',<br/> '021309W', '02130A3', '02130A8', '02130A9', '02130AC',<br/> '02130AF', '02130AW', '02130J3', '02130J8', '02130J9',<br/> '02130JC', '02130JF', '02130JW', '02130K3', '02130K8',<br/> '02130K9', '02130KC', '02130KF', '02130KW', '02130Z3',<br/> '02130Z8', '02130Z9', '02130ZC', '02130ZF', '0213344',<br/> '02133D4', '0213444', '0213493', '0213498', '0213499',<br/> '021349C', '021349F', '021349W', '02134A3', '02134A8',<br/> '02134A9', '02134AC', '02134AF', '02134AW',<br/> '02134D4', '02134J3', '02134J8', '02134J9', '02134JC',<br/> '02134JF',</p> <p>'02134JW', '02134K3', '02134K8', '02134K9', '02134KC',<br/> '02134KF', '02134KW', '02134Z3', '02134Z8', '02134Z9',<br/> '02134ZC', '02134ZF'</p> |  |
|--|--|--|-------------------------------------------------------------------------------------------------------------------------------------------------------------------------------------------------------------------------------------------------------------------------------------------------------------------------------------------------------------------------------------------------------------------------------------------------------------------------------------------------------------------------------------------------------------------------------------------------------------------------------------------------------------------------------------------------------------------------------------------------------------------------------------------------------------------------------------------------------------------------------------------------------------------------------------------------------------------------------------------------------------------------------------------------------------------------------------------------------------------------------------------------------------------------------------------------------------------------------------------------------------------------------------------------------------------------------------------------------------------------------------------------------------------------------------------------------------------------------------------------------------------------------------------------------------------------------------------------------------------------------------------------------------------------------------------------------------------------------------------------------------------------------------------------------------------------------------------------------------------------------------------------------------------------------------------------------------------------------------------------------------------------------------------------------------------------------------------------------------------------------------------------------------------------------------------------------------------------------------------------------------------------------------------------------------------------------------------------------------------------------------------------------------------------------------------------------------|--|

|  |  |                                                                                                                                                                                                                                                                                                                                                                                                                                                                                                                                                                                                                                                                                                                                                                                                                                                                                                                                                                                                                                                                                                                                                                                                                                                                                                                                                                                                                                                                                                                                                                                                                                                                                                                                                                                                                                                                                                                                                                                                                                                                                                                    |  |
|--|--|--------------------------------------------------------------------------------------------------------------------------------------------------------------------------------------------------------------------------------------------------------------------------------------------------------------------------------------------------------------------------------------------------------------------------------------------------------------------------------------------------------------------------------------------------------------------------------------------------------------------------------------------------------------------------------------------------------------------------------------------------------------------------------------------------------------------------------------------------------------------------------------------------------------------------------------------------------------------------------------------------------------------------------------------------------------------------------------------------------------------------------------------------------------------------------------------------------------------------------------------------------------------------------------------------------------------------------------------------------------------------------------------------------------------------------------------------------------------------------------------------------------------------------------------------------------------------------------------------------------------------------------------------------------------------------------------------------------------------------------------------------------------------------------------------------------------------------------------------------------------------------------------------------------------------------------------------------------------------------------------------------------------------------------------------------------------------------------------------------------------|--|
|  |  | <p>or<br/> CPT/HCPCS codes '33510', '33511', '33512', '33513',<br/> '33514', '33516', '33517', '33518', '33519', '33521',<br/> '33522', '33523', '33533', '33534', '33535', '33536'</p> <p><u>Codes for PCI:</u><br/> ICD-9 Diagnosis code V4582</p> <p>or<br/> ICD-10 Diagnosis code 'Z955', 'Z9861'</p> <p>or<br/> ICD-9 Procedure code '0066', '1755', '3601', '3602',<br/> '3605', '3606', '3607', '3609'</p> <p>or<br/> ICD-10 Procedure codes '0270046', '027004Z',<br/> '02700D6', '02700DZ', '02700T6', '02700TZ', '02700Z6',<br/> '02700ZZ', '0270346', '027034Z', '02703D6', '02703DZ',<br/> '02703T6', '02703TZ', '02703Z6', '02703ZZ', '0270446',<br/> '027044Z', '02704D6', '02704DZ', '02704T6', '02704TZ',<br/> '02704Z6', '02704ZZ', '0271046', '027104Z', '02710D6',<br/> '02710DZ', '02710T6', '02710TZ', '02710Z6', '02710ZZ',<br/> '0271346', '027134Z', '02713D6', '02713DZ', '02713T6',<br/> '02713TZ', '02713Z6', '02713ZZ', '0271446', '027144Z',<br/> '02714D6', '02714DZ', '02714T6', '02714TZ', '02714Z6',<br/> '02714ZZ', '0272046', '027204Z', '02720D6', '02720DZ',<br/> '02720T6', '02720TZ', '02720Z6', '02720ZZ', '0272346',<br/> '027234Z', '02723D6', '02723DZ', '02723T6', '02723TZ',<br/> '02723Z6', '02723ZZ', '0272446', '027244Z', '02724D6',<br/> '02724DZ', '02724T6', '02724TZ', '02724Z6', '02724ZZ',<br/> '0273046', '027304Z', '02730D6', '02730DZ', '02730T6',<br/> '02730TZ', '02730Z6', '02730ZZ', '0273346', '027334Z',<br/> '02733D6', '02733DZ', '02733T6', '02733TZ', '02733Z6',<br/> '02733ZZ', '0273446', '027344Z', '02734D6', '02734DZ',<br/> '02734T6', '02734TZ', '02734Z6', '02734ZZ', '02C03ZZ',<br/> '02C04ZZ', '02C13ZZ', '02C14ZZ', '02C23ZZ', '02C24ZZ',<br/> '02C33ZZ', '02C34ZZ', 'X2C0361', 'X2C1361'</p> <p>or<br/> CPT/HCPCS codes '92920', '92921', '92924', '92925',<br/> '92928', '92929', '92933', '92934', '92937', '92938',<br/> '92941', '92943', '92944', '92980', '92981', '92982',<br/> '92984', '92995', '92996', 'C9600', 'C9601', 'C9602',<br/> 'C9603', 'C9604', 'C9605', 'C9606', 'C9607', 'C9608',<br/> 'G0290', 'G0291'</p> |  |
|--|--|--------------------------------------------------------------------------------------------------------------------------------------------------------------------------------------------------------------------------------------------------------------------------------------------------------------------------------------------------------------------------------------------------------------------------------------------------------------------------------------------------------------------------------------------------------------------------------------------------------------------------------------------------------------------------------------------------------------------------------------------------------------------------------------------------------------------------------------------------------------------------------------------------------------------------------------------------------------------------------------------------------------------------------------------------------------------------------------------------------------------------------------------------------------------------------------------------------------------------------------------------------------------------------------------------------------------------------------------------------------------------------------------------------------------------------------------------------------------------------------------------------------------------------------------------------------------------------------------------------------------------------------------------------------------------------------------------------------------------------------------------------------------------------------------------------------------------------------------------------------------------------------------------------------------------------------------------------------------------------------------------------------------------------------------------------------------------------------------------------------------|--|

**eTable 2. Full cox proportional hazards model output, Model #1**

| Variable              | GLP-1a initiation |                    |         |                 | SGLT2i initiation |                    |         |                 |
|-----------------------|-------------------|--------------------|---------|-----------------|-------------------|--------------------|---------|-----------------|
|                       | Hazard ratio      | 95% Conf. Interval | P-value | Omnibus P-value | Hazard ratio      | 95% Conf. Interval | P-value | Omnibus P-value |
| Quartile of OOP Costs |                   |                    |         | <0.001          |                   |                    |         | <0.001          |
| 1                     | Ref.              | Ref.               | Ref.    |                 | Ref.              | Ref.               | Ref.    |                 |
| 2                     | 1.032             | (0.936, 1.138)     | 0.524   |                 | 0.74              | (0.681, 0.804)     | <0.001  |                 |
| 3                     | 0.79              | (0.713, 0.876)     | <0.001  |                 | 0.754             | (0.692, 0.82)      | <0.001  |                 |
| 4                     | 0.696             | (0.626, 0.775)     | <0.001  |                 | 0.676             | (0.62, 0.737)      | <0.001  |                 |

OOP = Out-of-pocket; Ref. = Reference

**eTable 3. Full cox proportional hazards model output, Model #2**

| Variable                | GLP-1a initiation |                    |         |                 | SGLT2i initiation |                    |         |                 |
|-------------------------|-------------------|--------------------|---------|-----------------|-------------------|--------------------|---------|-----------------|
|                         | Hazard ratio      | 95% Conf. Interval | P-value | Omnibus P-value | Hazard ratio      | 95% Conf. Interval | P-value | Omnibus P-value |
| Quartile of OOP Costs   |                   |                    |         | 0.003           |                   |                    |         | <0.001          |
| 1                       | Ref.              | Ref.               | Ref.    |                 | Ref.              | Ref.               | Ref.    |                 |
| 2                       | 1.049             | (0.95, 1.159)      | 0.346   |                 | 0.91              | (0.836, 0.992)     | 0.032   |                 |
| 3                       | 0.932             | (0.838, 1.038)     | 0.199   |                 | 0.866             | (0.793, 0.946)     | 0.001   |                 |
| 4                       | 0.859             | (0.768, 0.96)      | 0.008   |                 | 0.782             | (0.713, 0.857)     | <0.001  |                 |
| Age in years            | 0.937             | (0.934, 0.94)      | <0.001  |                 | 0.954             | (0.951, 0.957)     | <0.001  |                 |
| Sex                     |                   |                    |         | <0.001          |                   |                    |         | <0.001          |
| Male                    | Ref.              | Ref.               | Ref.    |                 | Ref.              | Ref.               | Ref.    |                 |
| Female                  | 1.203             | (1.116, 1.297)     | <0.001  |                 | 0.723             | (0.677, 0.772)     | <0.001  |                 |
| Unknown                 | 0                 | (0, 2.2e+280)      | 0.981   |                 | 0                 | (0, 1.7e+246)      | 0.978   |                 |
| Geographical Division   |                   |                    |         | <0.001          |                   |                    |         | <0.001          |
| East North Central      | Ref.              | Ref.               | Ref.    |                 | Ref.              | Ref.               | Ref.    |                 |
| East South Central      | 1.249             | (1.03, 1.516)      | 0.024   |                 | 1.023             | (0.858, 1.221)     | 0.798   |                 |
| Middle Atlantic         | 0.901             | (0.747, 1.086)     | 0.274   |                 | 0.996             | (0.859, 1.156)     | 0.962   |                 |
| Mountain                | 0.831             | (0.703, 0.983)     | 0.03    |                 | 0.807             | (0.702, 0.928)     | 0.003   |                 |
| New England             | 0.888             | (0.697, 1.13)      | 0.334   |                 | 1.06              | (0.881, 1.276)     | 0.535   |                 |
| Pacific                 | 0.821             | (0.703, 0.958)     | 0.013   |                 | 0.914             | (0.809, 1.032)     | 0.148   |                 |
| South Atlantic          | 0.975             | (0.855, 1.112)     | 0.711   |                 | 0.936             | (0.838, 1.045)     | 0.239   |                 |
| Unknown                 | 0.699             | (0.224, 2.181)     | 0.538   |                 | 0.613             | (0.229, 1.642)     | 0.33    |                 |
| West North Central      | 1.187             | (0.996, 1.416)     | 0.056   |                 | 1.097             | (0.941, 1.28)      | 0.236   |                 |
| West South Central      | 0.956             | (0.83, 1.102)      | 0.537   |                 | 0.794             | (0.703, 0.897)     | <0.001  |                 |
| Metformin fill year     |                   |                    |         | <0.001          |                   |                    |         | <0.001          |
| 2017                    | Ref.              | Ref.               | Ref.    |                 | Ref.              | Ref.               | Ref.    |                 |
| 2018                    | 1.203             | (1.096, 1.321)     | <0.001  |                 | 1.196             | (1.104, 1.295)     | <0.001  |                 |
| 2019                    | 1.58              | (1.38, 1.809)      | <0.001  |                 | 2.111             | (1.885, 2.365)     | <0.001  |                 |
| 2020                    | 2.102             | (1.795, 2.461)     | <0.001  |                 | 3.36              | (2.956, 3.818)     | <0.001  |                 |
| Education               |                   |                    |         | 0.493           |                   |                    |         | 0.206           |
| <12 <sup>th</sup> grade | Ref.              | Ref.               | Ref.    |                 | Ref.              | Ref.               | Ref.    |                 |
| High school diploma     | 1.122             | (0.709, 1.775)     | 0.623   |                 | 0.849             | (0.61, 1.182)      | 0.332   |                 |
| <Bachelor's degree      | 1.137             | (0.717, 1.801)     | 0.585   |                 | 0.867             | (0.622, 1.209)     | 0.399   |                 |
| ≥Bachelor's degree      | 1.091             | (0.677, 1.758)     | 0.722   |                 | 0.965             | (0.682, 1.364)     | 0.838   |                 |
| Unknown/missing         | 0.804             | (0.439, 1.471)     | 0.479   |                 | 0.998             | (0.631, 1.58)      | 0.994   |                 |
| Household income        |                   |                    |         | <0.001          |                   |                    |         | 0.002           |
| <\$40K                  | Ref.              | Ref.               | Ref.    |                 | Ref.              | Ref.               | Ref.    |                 |
| \$40K-\$49K             | 1.133             | (0.995, 1.289)     | 0.059   |                 | 1.069             | (0.957, 1.195)     | 0.238   |                 |
| \$50K-\$59K             | 0.956             | (0.831, 1.101)     | 0.535   |                 | 1.124             | (1.006, 1.255)     | 0.038   |                 |
| \$60K-\$74K             | 1.105             | (0.971, 1.258)     | 0.13    |                 | 1.058             | (0.949, 1.18)      | 0.309   |                 |
| \$75K-\$99K             | 1.217             | (1.079, 1.373)     | 0.001   |                 | 1.164             | (1.052, 1.289)     | 0.003   |                 |
| \$100K+                 | 1.236             | (1.091, 1.401)     | 0.001   |                 | 1.127             | (1.015, 1.253)     | 0.026   |                 |
| Unknown/missing         | 0.78              | (0.621, 0.979)     | 0.032   |                 | 0.811             | (0.672, 0.98)      | 0.03    |                 |
| Race                    |                   |                    |         | <0.001          |                   |                    |         | 0.024           |
| White                   | Ref.              | Ref.               | Ref.    |                 | Ref.              | Ref.               | Ref.    |                 |
| Black                   | 0.817             | (0.73, 0.914)      | <0.001  |                 | 0.919             | (0.834, 1.013)     | 0.089   |                 |
| Asian                   | 0.38              | (0.282, 0.51)      | <0.001  |                 | 0.812             | (0.686, 0.962)     | 0.016   |                 |
| Hispanic                | 0.777             | (0.694, 0.869)     | <0.001  |                 | 0.91              | (0.831, 0.998)     | 0.045   |                 |

|                 |       |                |      |  |       |                |       |  |
|-----------------|-------|----------------|------|--|-------|----------------|-------|--|
| Unknown/missing | 1.295 | (1.011, 1.657) | 0.04 |  | 1.059 | (0.847, 1.324) | 0.615 |  |
|-----------------|-------|----------------|------|--|-------|----------------|-------|--|

OOP = Out-of-pocket; Ref. = Reference

**eTable 4. Full cox proportional hazards model output, Model #3**

| Variable                | GLP-1a initiation |                    |         |                 | SGLT2i initiation |                    |         |                 |
|-------------------------|-------------------|--------------------|---------|-----------------|-------------------|--------------------|---------|-----------------|
|                         | Hazard ratio      | 95% Conf. Interval | P-value | Omnibus P-value | Hazard ratio      | 95% Conf. Interval | P-value | Omnibus P-value |
| Quartile of OOP Costs   |                   |                    |         | 0.002           |                   |                    |         | <0.001          |
| 1                       | Ref.              | Ref.               | Ref.    |                 | Ref.              | Ref.               | Ref.    |                 |
| 2                       | 1.048             | (0.948, 1.157)     | 0.36    |                 | 0.914             | (0.839, 0.995)     | 0.039   |                 |
| 3                       | 0.917             | (0.824, 1.021)     | 0.114   |                 | 0.871             | (0.797, 0.952)     | 0.002   |                 |
| 4                       | 0.858             | (0.767, 0.96)      | 0.007   |                 | 0.778             | (0.71, 0.853)      | <0.001  |                 |
| Age in years            | 0.939             | (0.935, 0.942)     | <0.001  |                 | 0.953             | (0.95, 0.956)      | <0.001  |                 |
| Sex                     |                   |                    |         | <0.001          |                   |                    |         | <0.001          |
| Male                    | Ref.              | Ref.               | Ref.    |                 | Ref.              | Ref.               | Ref.    |                 |
| Female                  | 1.195             | (1.106, 1.291)     | <0.001  |                 | 0.771             | (0.721, 0.825)     | <0.001  |                 |
| Unknown                 | 0.001             | (0, 2.4e+286)      | 0.982   |                 | 0                 | (0, 2.9e+247)      | 0.979   |                 |
| Geographical Division   |                   |                    |         | <0.001          |                   |                    |         | <0.001          |
| East North Central      | Ref.              | Ref.               | Ref.    |                 | Ref.              | Ref.               | Ref.    |                 |
| East South Central      | 1.249             | (1.029, 1.516)     | 0.025   |                 | 1.011             | (0.847, 1.207)     | 0.904   |                 |
| Middle Atlantic         | 0.924             | (0.766, 1.115)     | 0.41    |                 | 1.013             | (0.872, 1.175)     | 0.87    |                 |
| Mountain                | 0.809             | (0.684, 0.958)     | 0.014   |                 | 0.835             | (0.726, 0.96)      | 0.011   |                 |
| New England             | 0.907             | (0.712, 1.155)     | 0.427   |                 | 1.095             | (0.91, 1.319)      | 0.335   |                 |
| Pacific                 | 0.801             | (0.685, 0.938)     | 0.006   |                 | 0.96              | (0.849, 1.087)     | 0.522   |                 |
| South Atlantic          | 0.973             | (0.853, 1.11)      | 0.679   |                 | 0.949             | (0.85, 1.06)       | 0.351   |                 |
| Unknown                 | 0.696             | (0.223, 2.173)     | 0.533   |                 | 0.606             | (0.226, 1.624)     | 0.319   |                 |
| West North Central      | 1.177             | (0.987, 1.404)     | 0.069   |                 | 1.104             | (0.947, 1.288)     | 0.206   |                 |
| West South Central      | 0.925             | (0.801, 1.067)     | 0.285   |                 | 0.817             | (0.722, 0.924)     | 0.001   |                 |
| Metformin fill year     |                   |                    |         | <0.001          |                   |                    |         | <0.001          |
| 2017                    | Ref.              | Ref.               | Ref.    |                 | Ref.              | Ref.               | Ref.    |                 |
| 2018                    | 1.196             | (1.089, 1.313)     | <0.001  |                 | 1.2               | (1.108, 1.3)       | <0.001  |                 |
| 2019                    | 1.579             | (1.378, 1.809)     | <0.001  |                 | 2.128             | (1.899, 2.384)     | <0.001  |                 |
| 2020                    | 2.098             | (1.79, 2.458)      | <0.001  |                 | 3.428             | (3.014, 3.897)     | <0.001  |                 |
| Education               |                   |                    |         | 0.493           |                   |                    |         | 0.127           |
| <12 <sup>th</sup> grade | Ref.              | Ref.               | Ref.    |                 | Ref.              | Ref.               | Ref.    |                 |
| High school diploma     | 1.123             | (0.71, 1.776)      | 0.619   |                 | 0.831             | (0.597, 1.157)     | 0.273   |                 |
| <Bachelor's degree      | 1.149             | (0.725, 1.82)      | 0.555   |                 | 0.853             | (0.612, 1.19)      | 0.35    |                 |
| ≥Bachelor's degree      | 1.12              | (0.695, 1.805)     | 0.641   |                 | 0.958             | (0.678, 1.355)     | 0.81    |                 |
| Unknown/missing         | 0.808             | (0.441, 1.48)      | 0.49    |                 | 0.99              | (0.625, 1.566)     | 0.965   |                 |
| Household income        |                   |                    |         | <0.001          |                   |                    |         | 0.005           |
| <\$40K                  | Ref.              | Ref.               | Ref.    |                 | Ref.              | Ref.               | Ref.    |                 |
| \$40K-\$49K             | 1.148             | (1.008, 1.306)     | 0.037   |                 | 1.073             | (0.96, 1.199)      | 0.217   |                 |
| \$50K-\$59K             | 0.978             | (0.849, 1.126)     | 0.756   |                 | 1.128             | (1.01, 1.26)       | 0.033   |                 |
| \$60K-\$74K             | 1.123             | (0.986, 1.279)     | 0.08    |                 | 1.059             | (0.949, 1.182)     | 0.303   |                 |
| \$75K-\$99K             | 1.238             | (1.097, 1.398)     | 0.001   |                 | 1.166             | (1.053, 1.292)     | 0.003   |                 |
| \$100K+                 | 1.275             | (1.124, 1.446)     | <0.001  |                 | 1.124             | (1.011, 1.251)     | 0.031   |                 |
| Unknown/missing         | 0.801             | (0.638, 1.005)     | 0.055   |                 | 0.833             | (0.69, 1.006)      | 0.057   |                 |
| Race                    |                   |                    |         | <0.001          |                   |                    |         | 0.16            |



|                                       |       |                |        |  |       |                |        |  |
|---------------------------------------|-------|----------------|--------|--|-------|----------------|--------|--|
| White                                 | Ref.  | Ref.           | Ref.   |  | Ref.  | Ref.           | Ref.   |  |
| Black                                 | 0.827 | (0.738, 0.925) | 0.001  |  | 0.951 | (0.862, 1.049) | 0.313  |  |
| Asian                                 | 0.43  | (0.32, 0.579)  | <0.001 |  | 0.831 | (0.701, 0.985) | 0.033  |  |
| Hispanic                              | 0.79  | (0.705, 0.885) | <0.001 |  | 0.943 | (0.859, 1.035) | 0.214  |  |
| Unknown/missing                       | 1.29  | (1.007, 1.653) | 0.043  |  | 1.053 | (0.842, 1.316) | 0.653  |  |
| Baseline Comorbidities                |       |                |        |  |       |                |        |  |
| Congestive Heart Failure              | 1.028 | (0.936, 1.129) | 0.559  |  | 1.11  | (1.027, 1.2)   | 0.008  |  |
| Hypertension                          | 1.113 | (0.971, 1.275) | 0.124  |  | 1.072 | (0.959, 1.199) | 0.222  |  |
| Hyperlipidemia/<br>Hypercholesteremia | 1.063 | (0.943, 1.197) | 0.319  |  | 1.124 | (1.013, 1.249) | 0.028  |  |
| Chronic Kidney Disease                | 0.995 | (0.877, 1.128) | 0.934  |  | 0.854 | (0.767, 0.952) | 0.004  |  |
| Serious Hypoglyc. Event               | 1.056 | (0.711, 1.566) | 0.789  |  | 1.447 | (1.07, 1.956)  | 0.016  |  |
| Serious Hyperglyc. Event              | 1.166 | (0.813, 1.672) | 0.404  |  | 1.172 | (0.861, 1.595) | 0.313  |  |
| Diabetic Nephropathy                  | 1.215 | (1.072, 1.376) | 0.002  |  | 1.135 | (1.02, 1.263)  | 0.02   |  |
| Diabetic Neuropathy                   | 1.277 | (1.175, 1.388) | <0.001 |  | 1.079 | (1.004, 1.159) | 0.039  |  |
| Diabetic Retinopathy                  | 1.152 | (1.022, 1.298) | 0.021  |  | 1.09  | (0.985, 1.207) | 0.096  |  |
| Foot Ulcers                           | 0.888 | (0.804, 0.981) | 0.019  |  | 0.923 | (0.851, 1.002) | 0.055  |  |
| End Stage Renal Disease               | 1.183 | (0.848, 1.65)  | 0.322  |  | 1.024 | (0.751, 1.397) | 0.88   |  |
| Obesity                               | 1.604 | (1.484, 1.733) | <0.001 |  | 1.048 | (0.979, 1.123) | 0.175  |  |
| Smoker                                | 0.906 | (0.836, 0.983) | 0.017  |  | 0.907 | (0.847, 0.971) | 0.005  |  |
| Unstable Angina                       | 1.065 | (0.904, 1.254) | 0.453  |  | 0.946 | (0.818, 1.094) | 0.452  |  |
| Peripheral Artery Disease             | 0.928 | (0.841, 1.024) | 0.136  |  | 0.909 | (0.838, 0.986) | 0.021  |  |
| Myocardial Infarction                 | 1.032 | (0.941, 1.132) | 0.499  |  | 1.065 | (0.988, 1.148) | 0.103  |  |
| CABG                                  | 1.066 | (0.958, 1.185) | 0.243  |  | 1.144 | (1.052, 1.244) | 0.002  |  |
| PCI                                   | 1.141 | (1.039, 1.253) | 0.006  |  | 1.295 | (1.2, 1.397)   | <0.001 |  |
| Stroke                                | 0.879 | (0.788, 0.981) | 0.021  |  | 0.767 | (0.698, 0.844) | <0.001 |  |

OOP = Out-of-pocket

**eTable 5. Full cox proportional hazards model output, Model #4**

| Variable                | GLP-1a initiation |                    |         |                 | SGLT2i initiation |                    |         |                 |
|-------------------------|-------------------|--------------------|---------|-----------------|-------------------|--------------------|---------|-----------------|
|                         | Hazard ratio      | 95% Conf. Interval | P-value | Omnibus P-value | Hazard ratio      | 95% Conf. Interval | P-value | Omnibus P-value |
| Quartile of OOP Costs   |                   |                    |         | 0.006           |                   |                    |         | <0.001          |
| 1                       | Ref.              | Ref.               | Ref.    |                 | Ref.              | Ref.               | Ref.    |                 |
| 2                       | 1.042             | (0.944, 1.151)     | 0.414   |                 | 0.947             | (0.868, 1.032)     | 0.213   |                 |
| 3                       | 0.929             | (0.834, 1.034)     | 0.177   |                 | 0.913             | (0.834, 0.999)     | 0.047   |                 |
| 4                       | 0.864             | (0.773, 0.966)     | 0.01    |                 | 0.804             | (0.733, 0.881)     | <0.001  |                 |
| Age in years            | 0.943             | (0.939, 0.947)     | <0.001  |                 | 0.958             | (0.955, 0.962)     | <0.001  |                 |
| Sex                     |                   |                    |         | <0.001          |                   |                    |         | <0.001          |
| Male                    | Ref.              | Ref.               | Ref.    |                 | Ref.              | Ref.               | Ref.    |                 |
| Female                  | 1.202             | (1.113, 1.299)     | <0.001  |                 | 0.777             | (0.726, 0.831)     | <0.001  |                 |
| Unknown                 | 0                 | (0, Inf)           | 0.983   |                 | 0                 | (0, 3.2e+263)      | 0.979   |                 |
| Geographical Division   |                   |                    |         | <0.001          |                   |                    |         | 0.001           |
| East North Central      | Ref.              | Ref.               | Ref.    |                 | Ref.              | Ref.               | Ref.    |                 |
| East South Central      | 1.266             | (1.043, 1.536)     | 0.017   |                 | 1.022             | (0.856, 1.22)      | 0.808   |                 |
| Middle Atlantic         | 0.939             | (0.778, 1.132)     | 0.509   |                 | 1.025             | (0.883, 1.19)      | 0.746   |                 |
| Mountain                | 0.83              | (0.701, 0.982)     | 0.03    |                 | 0.85              | (0.739, 0.978)     | 0.023   |                 |
| New England             | 0.932             | (0.732, 1.187)     | 0.567   |                 | 1.122             | (0.932, 1.351)     | 0.223   |                 |
| Pacific                 | 0.817             | (0.698, 0.956)     | 0.012   |                 | 0.977             | (0.863, 1.106)     | 0.714   |                 |
| South Atlantic          | 0.995             | (0.872, 1.135)     | 0.937   |                 | 0.969             | (0.868, 1.082)     | 0.577   |                 |
| Unknown                 | 0.686             | (0.22, 2.14)       | 0.516   |                 | 0.591             | (0.22, 1.582)      | 0.295   |                 |
| West North Central      | 1.17              | (0.981, 1.395)     | 0.08    |                 | 1.088             | (0.933, 1.269)     | 0.28    |                 |
| West South Central      | 0.946             | (0.82, 1.093)      | 0.452   |                 | 0.83              | (0.734, 0.939)     | 0.003   |                 |
| Metformin fill year     |                   |                    |         | <0.001          |                   |                    |         | <0.001          |
| 2017                    | Ref.              | Ref.               | Ref.    |                 | Ref.              | Ref.               | Ref.    |                 |
| 2018                    | 1.205             | (1.098, 1.323)     | <0.001  |                 | 1.209             | (1.116, 1.31)      | <0.001  |                 |
| 2019                    | 1.582             | (1.381, 1.812)     | <0.001  |                 | 2.128             | (1.9, 2.385)       | <0.001  |                 |
| 2020                    | 2.09              | (1.783, 2.449)     | <0.001  |                 | 3.42              | (3.008, 3.888)     | <0.001  |                 |
| Education               |                   |                    |         | 0.541           |                   |                    |         | 0.15            |
| <12 <sup>th</sup> grade | Ref.              | Ref.               | Ref.    |                 | Ref.              | Ref.               | Ref.    |                 |
| High school diploma     | 1.135             | (0.718, 1.795)     | 0.589   |                 | 0.844             | (0.606, 1.175)     | 0.315   |                 |
| <Bachelor's degree      | 1.152             | (0.727, 1.825)     | 0.546   |                 | 0.86              | (0.617, 1.2)       | 0.375   |                 |
| ≥Bachelor's degree      | 1.122             | (0.696, 1.808)     | 0.636   |                 | 0.966             | (0.683, 1.365)     | 0.844   |                 |
| Unknown/missing         | 0.824             | (0.45, 1.509)      | 0.531   |                 | 1.009             | (0.638, 1.597)     | 0.968   |                 |
| Household income        |                   |                    |         | 0.001           |                   |                    |         | 0.036           |
| <\$40K                  | Ref.              | Ref.               | Ref.    |                 | Ref.              | Ref.               | Ref.    |                 |
| \$40K-\$49K             | 1.131             | (0.994, 1.288)     | 0.062   |                 | 1.06              | (0.948, 1.185)     | 0.305   |                 |
| \$50K-\$59K             | 0.961             | (0.834, 1.106)     | 0.576   |                 | 1.111             | (0.994, 1.241)     | 0.064   |                 |
| \$60K-\$74K             | 1.093             | (0.96, 1.246)      | 0.179   |                 | 1.032             | (0.925, 1.152)     | 0.573   |                 |
| \$75K-\$99K             | 1.192             | (1.055, 1.347)     | 0.005   |                 | 1.128             | (1.018, 1.25)      | 0.021   |                 |
| \$100K+                 | 1.202             | (1.057, 1.366)     | 0.005   |                 | 1.065             | (0.956, 1.187)     | 0.25    |                 |
| Unknown/missing         | 0.797             | (0.635, 1)         | 0.05    |                 | 0.832             | (0.689, 1.005)     | 0.057   |                 |
| Race                    |                   |                    |         | <0.001          |                   |                    |         | 0.159           |

|                                       |       |                |        |  |       |                |        |  |
|---------------------------------------|-------|----------------|--------|--|-------|----------------|--------|--|
| White                                 | Ref.  | Ref.           | Ref.   |  | Ref.  | Ref.           | Ref.   |  |
| Black                                 | 0.828 | (0.74, 0.927)  | 0.001  |  | 0.954 | (0.865, 1.052) | 0.342  |  |
| Asian                                 | 0.43  | (0.32, 0.579)  | <0.001 |  | 0.83  | (0.7, 0.984)   | 0.032  |  |
| Hispanic                              | 0.789 | (0.704, 0.884) | <0.001 |  | 0.943 | (0.859, 1.034) | 0.211  |  |
| Unknown/missing                       | 1.296 | (1.012, 1.66)  | 0.04   |  | 1.057 | (0.845, 1.321) | 0.628  |  |
| Baseline Comorbidities                |       |                |        |  |       |                |        |  |
| Congestive Heart Failure              | 1.039 | (0.946, 1.141) | 0.426  |  | 1.12  | (1.036, 1.211) | 0.004  |  |
| Hypertension                          | 1.111 | (0.97, 1.273)  | 0.13   |  | 1.073 | (0.959, 1.199) | 0.218  |  |
| Hyperlipidemia/<br>Hypercholesteremia | 1.068 | (0.948, 1.203) | 0.282  |  | 1.13  | (1.017, 1.254) | 0.023  |  |
| Chronic Kidney Disease                | 1.001 | (0.882, 1.135) | 0.993  |  | 0.859 | (0.77, 0.957)  | 0.006  |  |
| Serious Hypoglyc. Event               | 1.057 | (0.712, 1.568) | 0.784  |  | 1.454 | (1.075, 1.965) | 0.015  |  |
| Serious Hyperglyc. Event              | 1.171 | (0.817, 1.68)  | 0.39   |  | 1.171 | (0.861, 1.594) | 0.314  |  |
| Diabetic Nephropathy                  | 1.221 | (1.077, 1.383) | 0.002  |  | 1.137 | (1.022, 1.265) | 0.018  |  |
| Diabetic Neuropathy                   | 1.304 | (1.199, 1.417) | <0.001 |  | 1.097 | (1.021, 1.179) | 0.012  |  |
| Diabetic Retinopathy                  | 1.161 | (1.03, 1.309)  | 0.014  |  | 1.098 | (0.992, 1.216) | 0.072  |  |
| Foot Ulcers                           | 0.893 | (0.809, 0.986) | 0.025  |  | 0.928 | (0.855, 1.007) | 0.072  |  |
| End Stage Renal Disease               | 1.187 | (0.851, 1.655) | 0.313  |  | 1.026 | (0.752, 1.4)   | 0.87   |  |
| Obesity                               | 1.605 | (1.485, 1.734) | <0.001 |  | 1.05  | (0.981, 1.125) | 0.16   |  |
| Smoker                                | 0.918 | (0.847, 0.996) | 0.039  |  | 0.918 | (0.857, 0.983) | 0.014  |  |
| Unstable Angina                       | 1.056 | (0.897, 1.244) | 0.511  |  | 0.943 | (0.815, 1.09)  | 0.425  |  |
| Peripheral Artery Disease             | 0.932 | (0.845, 1.029) | 0.162  |  | 0.913 | (0.842, 0.99)  | 0.028  |  |
| Myocardial Infarction                 | 1.03  | (0.939, 1.13)  | 0.53   |  | 1.062 | (0.985, 1.145) | 0.118  |  |
| CABG                                  | 1.07  | (0.962, 1.191) | 0.211  |  | 1.146 | (1.054, 1.247) | 0.001  |  |
| PCI                                   | 1.14  | (1.038, 1.252) | 0.006  |  | 1.293 | (1.198, 1.395) | <0.001 |  |
| Stroke                                | 0.883 | (0.792, 0.985) | 0.026  |  | 0.77  | (0.7, 0.847)   | <0.001 |  |
| Insurance type                        |       |                |        |  |       |                |        |  |
| Commercial                            | Ref.  | Ref.           | Ref.   |  | Ref.  | Ref.           | Ref.   |  |
| Medicare                              | 0.759 | (0.68, 0.847)  | <0.001 |  | 0.74  | (0.671, 0.815) | <0.001 |  |

OOP = Out-of-pocket; Ref.=Reference; Hyperglyc. = Hyperglycemic

**eTable 6. Full cox proportional hazards model output, Model #5**

| Variable                | GLP-1a initiation |                    |         |                 | SGLT2i initiation |                    |         |                 |
|-------------------------|-------------------|--------------------|---------|-----------------|-------------------|--------------------|---------|-----------------|
|                         | Hazard ratio      | 95% Conf. Interval | P-value | Omnibus P-value | Hazard ratio      | 95% Conf. Interval | P-value | Omnibus P-value |
| Quartile of OOP Costs   |                   |                    |         | 0.006           |                   |                    |         | <0.001          |
| 1                       | Ref.              | Ref.               | Ref.    |                 | Ref.              | Ref.               | Ref.    |                 |
| 2                       | 1.041             | (0.943, 1.15)      | 0.427   |                 | 0.946             | (0.868, 1.032)     | 0.21    |                 |
| 3                       | 0.929             | (0.835, 1.034)     | 0.18    |                 | 0.913             | (0.835, 0.999)     | 0.048   |                 |
| 4                       | 0.864             | (0.773, 0.966)     | 0.01    |                 | 0.803             | (0.733, 0.881)     | <0.001  |                 |
| Age in years            | 0.944             | (0.94, 0.948)      | <0.001  |                 | 0.958             | (0.955, 0.962)     | <0.001  |                 |
| Sex                     |                   |                    |         | <0.001          |                   |                    |         | <0.001          |
| Male                    | Ref.              | Ref.               | Ref.    |                 | Ref.              | Ref.               | Ref.    |                 |
| Female                  | 1.194             | (1.106, 1.29)      | <0.001  |                 | 0.775             | (0.724, 0.829)     | <0.001  |                 |
| Unknown                 | 0                 | (0, Inf)           | 0.983   |                 | 0                 | (0, 4.8e+263)      | 0.979   |                 |
| Geographical Division   |                   |                    |         | <0.001          |                   |                    |         | 0.001           |
| East North Central      | Ref.              | Ref.               | Ref.    |                 | Ref.              | Ref.               | Ref.    |                 |
| East South Central      | 1.275             | (1.051, 1.547)     | 0.014   |                 | 1.025             | (0.859, 1.224)     | 0.781   |                 |
| Middle Atlantic         | 0.924             | (0.766, 1.115)     | 0.412   |                 | 1.012             | (0.871, 1.175)     | 0.877   |                 |
| Mountain                | 0.832             | (0.703, 0.985)     | 0.033   |                 | 0.852             | (0.74, 0.98)       | 0.025   |                 |
| New England             | 0.923             | (0.724, 1.175)     | 0.515   |                 | 1.119             | (0.929, 1.347)     | 0.237   |                 |
| Pacific                 | 0.82              | (0.701, 0.96)      | 0.013   |                 | 0.977             | (0.863, 1.106)     | 0.714   |                 |
| South Atlantic          | 0.995             | (0.872, 1.135)     | 0.936   |                 | 0.967             | (0.866, 1.08)      | 0.548   |                 |
| Unknown                 | 0.687             | (0.22, 2.145)      | 0.519   |                 | 0.591             | (0.22, 1.583)      | 0.295   |                 |
| West North Central      | 1.178             | (0.988, 1.405)     | 0.067   |                 | 1.09              | (0.935, 1.271)     | 0.271   |                 |
| West South Central      | 0.954             | (0.827, 1.102)     | 0.523   |                 | 0.831             | (0.735, 0.94)      | 0.003   |                 |
| Metformin fill year     |                   |                    |         | <0.001          |                   |                    |         | <0.001          |
| 2017                    | Ref.              | Ref.               | Ref.    |                 | Ref.              | Ref.               | Ref.    |                 |
| 2018                    | 1.207             | (1.099, 1.326)     | <0.001  |                 | 1.209             | (1.116, 1.311)     | <0.001  |                 |
| 2019                    | 1.573             | (1.373, 1.802)     | <0.001  |                 | 2.128             | (1.899, 2.385)     | <0.001  |                 |
| 2020                    | 2.083             | (1.777, 2.441)     | <0.001  |                 | 3.423             | (3.01, 3.893)      | <0.001  |                 |
| Education               |                   |                    |         | 0.529           |                   |                    |         | 0.186           |
| <12 <sup>th</sup> grade | Ref.              | Ref.               | Ref.    |                 | Ref.              | Ref.               | Ref.    |                 |
| High school diploma     | 1.146             | (0.725, 1.813)     | 0.559   |                 | 0.847             | (0.609, 1.18)      | 0.326   |                 |

|                                       |       |                |        |        |       |                |       |       |
|---------------------------------------|-------|----------------|--------|--------|-------|----------------|-------|-------|
| <Bachelor's degree                    | 1.16  | (0.732, 1.838) | 0.527  |        | 0.863 | (0.619, 1.203) | 0.385 |       |
| ≥Bachelor's degree                    | 1.119 | (0.695, 1.804) | 0.644  |        | 0.963 | (0.681, 1.361) | 0.831 |       |
| Unknown/missing                       | 0.833 | (0.455, 1.526) | 0.554  |        | 1.009 | (0.638, 1.597) | 0.968 |       |
| Household income                      |       |                |        | 0.001  |       |                |       | 0.044 |
| <\$40K                                | Ref.  | Ref.           | Ref.   |        | Ref.  | Ref.           | Ref.  |       |
| \$40K-\$49K                           | 1.13  | (0.992, 1.286) | 0.065  |        | 1.058 | (0.947, 1.183) | 0.318 |       |
| \$50K-\$59K                           | 0.957 | (0.831, 1.103) | 0.546  |        | 1.108 | (0.992, 1.238) | 0.07  |       |
| \$60K-\$74K                           | 1.092 | (0.959, 1.244) | 0.185  |        | 1.031 | (0.924, 1.151) | 0.584 |       |
| \$75K-\$99K                           | 1.187 | (1.05, 1.34)   | 0.006  |        | 1.125 | (1.015, 1.246) | 0.025 |       |
| \$100K+                               | 1.192 | (1.048, 1.355) | 0.007  |        | 1.058 | (0.95, 1.179)  | 0.306 |       |
| Unknown/missing                       | 0.797 | (0.635, 1)     | 0.05   |        | 0.834 | (0.69, 1.006)  | 0.058 |       |
| Race                                  |       |                |        | <0.001 |       |                |       | 0.142 |
| White                                 | Ref.  | Ref.           | Ref.   |        | Ref.  | Ref.           | Ref.  |       |
| Black                                 | 0.829 | (0.741, 0.928) | 0.001  |        | 0.953 | (0.865, 1.051) | 0.337 |       |
| Asian                                 | 0.426 | (0.317, 0.574) | <0.001 |        | 0.826 | (0.697, 0.98)  | 0.028 |       |
| Hispanic                              | 0.79  | (0.705, 0.886) | <0.001 |        | 0.941 | (0.858, 1.033) | 0.201 |       |
| Unknown/missing                       | 1.29  | (1.008, 1.652) | 0.043  |        | 1.055 | (0.844, 1.319) | 0.638 |       |
| Baseline Comorbidities                |       |                |        |        |       |                |       |       |
| Congestive Heart Failure              | 1.038 | (0.945, 1.14)  | 0.434  |        | 1.119 | (1.035, 1.21)  | 0.005 |       |
| Hypertension                          | 1.112 | (0.971, 1.275) | 0.125  |        | 1.073 | (0.96, 1.2)    | 0.214 |       |
| Hyperlipidemia/<br>Hypercholesteremia | 1.062 | (0.942, 1.197) | 0.324  |        | 1.126 | (1.013, 1.25)  | 0.027 |       |
| Chronic Kidney Disease                | 1.002 | (0.884, 1.137) | 0.969  |        | 0.859 | (0.771, 0.957) | 0.006 |       |
| Serious Hypoglyc. Event               | 1.023 | (0.689, 1.518) | 0.911  |        | 1.424 | (1.053, 1.925) | 0.022 |       |
| Serious Hyperglyc. Event              | 1.173 | (0.818, 1.682) | 0.386  |        | 1.174 | (0.863, 1.598) | 0.308 |       |
| Diabetic Nephropathy                  | 1.213 | (1.071, 1.375) | 0.002  |        | 1.136 | (1.021, 1.263) | 0.019 |       |
| Diabetic Neuropathy                   | 1.295 | (1.191, 1.408) | <0.001 |        | 1.095 | (1.018, 1.176) | 0.014 |       |
| Diabetic Retinopathy                  | 1.153 | (1.023, 1.3)   | 0.02   |        | 1.094 | (0.988, 1.211) | 0.085 |       |
| Foot Ulcers                           | 0.897 | (0.812, 0.99)  | 0.031  |        | 0.929 | (0.856, 1.008) | 0.077 |       |

|                           |       |                |        |        |       |                |        |       |
|---------------------------|-------|----------------|--------|--------|-------|----------------|--------|-------|
| End Stage Renal Disease   | 1.189 | (0.853, 1.659) | 0.307  |        | 1.023 | (0.75, 1.395)  | 0.887  |       |
| Obesity                   | 1.599 | (1.48, 1.728)  | <0.001 |        | 1.049 | (0.98, 1.124)  | 0.166  |       |
| Smoker                    | 0.921 | (0.849, 0.999) | 0.047  |        | 0.919 | (0.859, 0.984) | 0.016  |       |
| Unstable Angina           | 1.058 | (0.898, 1.246) | 0.499  |        | 0.942 | (0.815, 1.089) | 0.42   |       |
| Peripheral Artery Disease | 0.933 | (0.845, 1.029) | 0.165  |        | 0.914 | (0.843, 0.992) | 0.03   |       |
| Myocardial Infarction     | 1.031 | (0.939, 1.13)  | 0.524  |        | 1.062 | (0.985, 1.145) | 0.119  |       |
| CABG                      | 1.067 | (0.959, 1.187) | 0.231  |        | 1.144 | (1.052, 1.244) | 0.002  |       |
| PCI                       | 1.14  | (1.038, 1.252) | 0.006  |        | 1.29  | (1.195, 1.391) | <0.001 |       |
| Stroke                    | 0.882 | (0.79, 0.984)  | 0.024  |        | 0.771 | (0.701, 0.848) | <0.001 |       |
| Insurance type            |       |                |        |        |       |                |        |       |
| Commercial                | Ref.  | Ref.           | Ref.   |        | Ref.  | Ref.           | Ref.   |       |
| Medicare                  | 0.765 | (0.685, 0.854) | <0.001 |        | 0.744 | (0.675, 0.82)  | <0.001 |       |
| Provider type             |       |                |        | <0.001 |       |                |        | 0.018 |
| Fam. Prac./Internal Med.  | Ref.  | Ref.           | Ref.   |        | Ref.  | Ref.           | Ref.   |       |
| Endocrinology             | 1.63  | (1.351, 1.967) | <0.001 |        | 1.343 | (1.126, 1.601) | 0.001  |       |
| Cardiology                | 0.983 | (0.735, 1.316) | 0.911  |        | 1.173 | (0.951, 1.447) | 0.135  |       |
| Unknown                   | 0.974 | (0.855, 1.108) | 0.685  |        | 1     | (0.898, 1.112) | 0.994  |       |
| Other                     | 1.079 | (0.969, 1.202) | 0.165  |        | 0.998 | (0.908, 1.096) | 0.964  |       |

OOP = Out-of-pocket; Ref.=Reference; Hyperglyc. = Hyperglycemic; Hypoglyc. = Hypoglycemic; Fam. Prac./Internal Med.= Family Practice/Internal Medicine

**eTable 7. Full cox proportional hazards model output, Model #6**

| Variable                | GLP-1a initiation |                    |         |                 | SGLT2i initiation |                    |         |                 |
|-------------------------|-------------------|--------------------|---------|-----------------|-------------------|--------------------|---------|-----------------|
|                         | Hazard ratio      | 95% Conf. Interval | P-value | Omnibus P-value | Hazard ratio      | 95% Conf. Interval | P-value | Omnibus P-value |
| Quartile of OOP Costs   |                   |                    |         | 0.007           |                   |                    |         | <0.001          |
| 1                       | Ref.              | Ref.               | Ref.    |                 | Ref.              | Ref.               | Ref.    |                 |
| 2                       | 1.05              | (0.95, 1.16)       | 0.341   |                 | 0.947             | (0.868, 1.032)     | 0.215   |                 |
| 3                       | 0.937             | (0.842, 1.043)     | 0.234   |                 | 0.914             | (0.835, 1)         | 0.05    |                 |
| 4                       | 0.871             | (0.779, 0.974)     | 0.015   |                 | 0.804             | (0.733, 0.881)     | <0.001  |                 |
| Age in years            | 0.944             | (0.94, 0.948)      | <0.001  |                 | 0.958             | (0.955, 0.962)     | <0.001  |                 |
| Sex                     |                   |                    |         | <0.001          |                   |                    |         | <0.001          |
| Male                    | Ref.              | Ref.               | Ref.    |                 | Ref.              | Ref.               | Ref.    |                 |
| Female                  | 1.196             | (1.107, 1.292)     | <0.001  |                 | 0.775             | (0.724, 0.829)     | <0.001  |                 |
| Unknown                 | 0                 | (0, Inf)           | 0.983   |                 | 0                 | (0, 4.1e+263)      | 0.979   |                 |
| Geographical Division   |                   |                    |         | 0.002           |                   |                    |         | 0.001           |
| East North Central      | Ref.              | Ref.               | Ref.    |                 | Ref.              | Ref.               | Ref.    |                 |
| East South Central      | 1.27              | (1.047, 1.541)     | 0.015   |                 | 1.025             | (0.859, 1.224)     | 0.783   |                 |
| Middle Atlantic         | 0.933             | (0.773, 1.126)     | 0.468   |                 | 1.013             | (0.873, 1.177)     | 0.861   |                 |
| Mountain                | 0.852             | (0.719, 1.009)     | 0.064   |                 | 0.855             | (0.743, 0.984)     | 0.029   |                 |
| New England             | 0.914             | (0.717, 1.164)     | 0.466   |                 | 1.117             | (0.928, 1.345)     | 0.242   |                 |
| Pacific                 | 0.838             | (0.715, 0.981)     | 0.028   |                 | 0.98              | (0.865, 1.11)      | 0.754   |                 |
| South Atlantic          | 1.009             | (0.884, 1.152)     | 0.894   |                 | 0.969             | (0.867, 1.082)     | 0.576   |                 |
| Unknown                 | 0.71              | (0.227, 2.216)     | 0.555   |                 | 0.593             | (0.221, 1.59)      | 0.299   |                 |
| West North Central      | 1.152             | (0.966, 1.375)     | 0.115   |                 | 1.086             | (0.931, 1.268)     | 0.293   |                 |
| West South Central      | 0.964             | (0.835, 1.113)     | 0.615   |                 | 0.832             | (0.736, 0.941)     | 0.003   |                 |
| Metformin fill year     |                   |                    |         | <0.001          |                   |                    |         | <0.001          |
| 2017                    | Ref.              | Ref.               | Ref.    |                 | Ref.              | Ref.               | Ref.    |                 |
| 2018                    | 1.208             | (1.1, 1.327)       | <0.001  |                 | 1.21              | (1.116, 1.311)     | <0.001  |                 |
| 2019                    | 1.566             | (1.367, 1.794)     | <0.001  |                 | 2.127             | (1.898, 2.383)     | <0.001  |                 |
| 2020                    | 2.076             | (1.771, 2.433)     | <0.001  |                 | 3.421             | (3.008, 3.89)      | <0.001  |                 |
| Education               |                   |                    |         | 0.544           |                   |                    |         | 0.185           |
| <12 <sup>th</sup> grade | Ref.              | Ref.               | Ref.    |                 | Ref.              | Ref.               | Ref.    |                 |
| High school diploma     | 1.151             | (0.728, 1.82)      | 0.548   |                 | 0.847             | (0.609, 1.18)      | 0.327   |                 |

|                                       |       |                |        |        |       |                |       |       |
|---------------------------------------|-------|----------------|--------|--------|-------|----------------|-------|-------|
| <Bachelor's degree                    | 1.166 | (0.736, 1.847) | 0.513  |        | 0.863 | (0.619, 1.204) | 0.386 |       |
| ≥Bachelor's degree                    | 1.125 | (0.698, 1.813) | 0.628  |        | 0.963 | (0.681, 1.362) | 0.832 |       |
| Unknown/missing                       | 0.843 | (0.461, 1.544) | 0.581  |        | 1.011 | (0.639, 1.599) | 0.963 |       |
| Household income                      |       |                |        | 0.001  |       |                |       | 0.042 |
| <\$40K                                | Ref.  | Ref.           | Ref.   |        | Ref.  | Ref.           | Ref.  |       |
| \$40K-\$49K                           | 1.129 | (0.992, 1.286) | 0.066  |        | 1.058 | (0.947, 1.183) | 0.317 |       |
| \$50K-\$59K                           | 0.96  | (0.834, 1.106) | 0.574  |        | 1.108 | (0.992, 1.238) | 0.069 |       |
| \$60K-\$74K                           | 1.096 | (0.962, 1.248) | 0.169  |        | 1.032 | (0.924, 1.151) | 0.579 |       |
| \$75K-\$99K                           | 1.196 | (1.059, 1.351) | 0.004  |        | 1.126 | (1.016, 1.248) | 0.024 |       |
| \$100K+                               | 1.202 | (1.057, 1.366) | 0.005  |        | 1.059 | (0.951, 1.18)  | 0.296 |       |
| Unknown/missing                       | 0.793 | (0.632, 0.995) | 0.046  |        | 0.833 | (0.69, 1.006)  | 0.057 |       |
| Race                                  |       |                |        | <0.001 |       |                |       | 0.154 |
| White                                 | Ref.  | Ref.           | Ref.   |        | Ref.  | Ref.           | Ref.  |       |
| Black                                 | 0.828 | (0.74, 0.927)  | 0.001  |        | 0.953 | (0.864, 1.051) | 0.334 |       |
| Asian                                 | 0.431 | (0.321, 0.58)  | <0.001 |        | 0.828 | (0.698, 0.982) | 0.03  |       |
| Hispanic                              | 0.805 | (0.718, 0.903) | <0.001 |        | 0.944 | (0.86, 1.036)  | 0.224 |       |
| Unknown/missing                       | 1.299 | (1.015, 1.664) | 0.038  |        | 1.056 | (0.845, 1.32)  | 0.632 | 1.299 |
| Baseline Comorbidities                |       |                |        |        |       |                |       |       |
| Congestive Heart Failure              | 1.034 | (0.941, 1.135) | 0.488  |        | 1.119 | (1.035, 1.209) | 0.005 |       |
| Hypertension                          | 1.109 | (0.968, 1.271) | 0.135  |        | 1.073 | (0.96, 1.2)    | 0.215 |       |
| Hyperlipidemia/<br>Hypercholesteremia | 1.072 | (0.951, 1.208) | 0.254  |        | 1.127 | (1.015, 1.252) | 0.025 |       |
| Chronic Kidney Disease                | 1.008 | (0.889, 1.144) | 0.897  |        | 0.86  | (0.771, 0.958) | 0.006 |       |
| Serious Hypoglyc. Event               | 1.025 | (0.691, 1.522) | 0.901  |        | 1.424 | (1.054, 1.926) | 0.021 |       |
| Serious Hyperglyc. Event              | 1.173 | (0.818, 1.682) | 0.386  |        | 1.174 | (0.862, 1.597) | 0.309 |       |
| Diabetic Nephropathy                  | 1.218 | (1.075, 1.38)  | 0.002  |        | 1.136 | (1.021, 1.264) | 0.019 |       |
| Diabetic Neuropathy                   | 1.299 | (1.194, 1.412) | <0.001 |        | 1.095 | (1.019, 1.177) | 0.014 |       |
| Diabetic Retinopathy                  | 1.157 | (1.027, 1.305) | 0.017  |        | 1.094 | (0.988, 1.212) | 0.083 |       |
| Foot Ulcers                           | 0.902 | (0.816, 0.996) | 0.041  |        | 0.93  | (0.856, 1.009) | 0.08  |       |
| End Stage Renal Disease               | 1.188 | (0.852, 1.657) | 0.31   |        | 1.022 | (0.75, 1.395)  | 0.889 |       |



|                           |       |                |        |        |       |                |        |       |
|---------------------------|-------|----------------|--------|--------|-------|----------------|--------|-------|
| Obesity                   | 1.603 | (1.483, 1.732) | <0.001 |        | 1.05  | (0.981, 1.124) | 0.162  |       |
| Smoker                    | 0.918 | (0.846, 0.995) | 0.038  |        | 0.919 | (0.858, 0.984) | 0.015  |       |
| Unstable Angina           | 1.057 | (0.898, 1.245) | 0.504  |        | 0.942 | (0.815, 1.089) | 0.419  |       |
| Peripheral Artery Disease | 0.937 | (0.849, 1.034) | 0.193  |        | 0.915 | (0.843, 0.992) | 0.032  |       |
| Myocardial Infarction     | 1.03  | (0.939, 1.13)  | 0.535  |        | 1.062 | (0.985, 1.144) | 0.12   |       |
| CABG                      | 1.064 | (0.957, 1.184) | 0.252  |        | 1.143 | (1.051, 1.244) | 0.002  |       |
| PCI                       | 1.135 | (1.033, 1.247) | 0.008  |        | 1.289 | (1.194, 1.391) | <0.001 |       |
| Stroke                    | 0.879 | (0.788, 0.981) | 0.021  |        | 0.771 | (0.701, 0.848) | <0.001 |       |
| Insurance type            |       |                |        |        |       |                |        |       |
| Commercial                | Ref.  | Ref.           | Ref.   |        | Ref.  | Ref.           | Ref.   |       |
| Medicare                  | 0.772 | (0.692, 0.863) | <0.001 |        | 0.745 | (0.676, 0.821) | <0.001 |       |
| Provider type             |       |                |        | <0.001 |       |                |        | 0.018 |
| Fam. Prac./Internal Med.  | Ref.  | Ref.           | Ref.   |        | Ref.  | Ref.           | Ref.   |       |
| Endocrinology             | 1.636 | (1.356, 1.974) | <0.001 |        | 1.344 | (1.127, 1.602) | 0.001  |       |
| Cardiology                | 0.981 | (0.733, 1.313) | 0.896  |        | 1.173 | (0.951, 1.446) | 0.136  |       |
| Unknown                   | 0.971 | (0.853, 1.106) | 0.659  |        | 0.999 | (0.898, 1.112) | 0.989  |       |
| Other                     | 1.074 | (0.964, 1.197) | 0.193  |        | 0.997 | (0.908, 1.095) | 0.952  |       |
| HbA1c at Baseline         | 0.893 | (0.826, 0.966) | 0.005  |        | 0.983 | (0.921, 1.049) | 0.606  |       |

OOP = Out-of-pocket; Ref.=Reference; Hyperglyc. = Hyperglycemic; Hypoglyc. = Hypoglycemic; Fam. Prac./Internal Med.= Family Practice/Internal Medicine

eFigure 1. Cumulative incidence curve for statin initiation stratified by Q1 through Q4 of OOP costs for GLP-1a

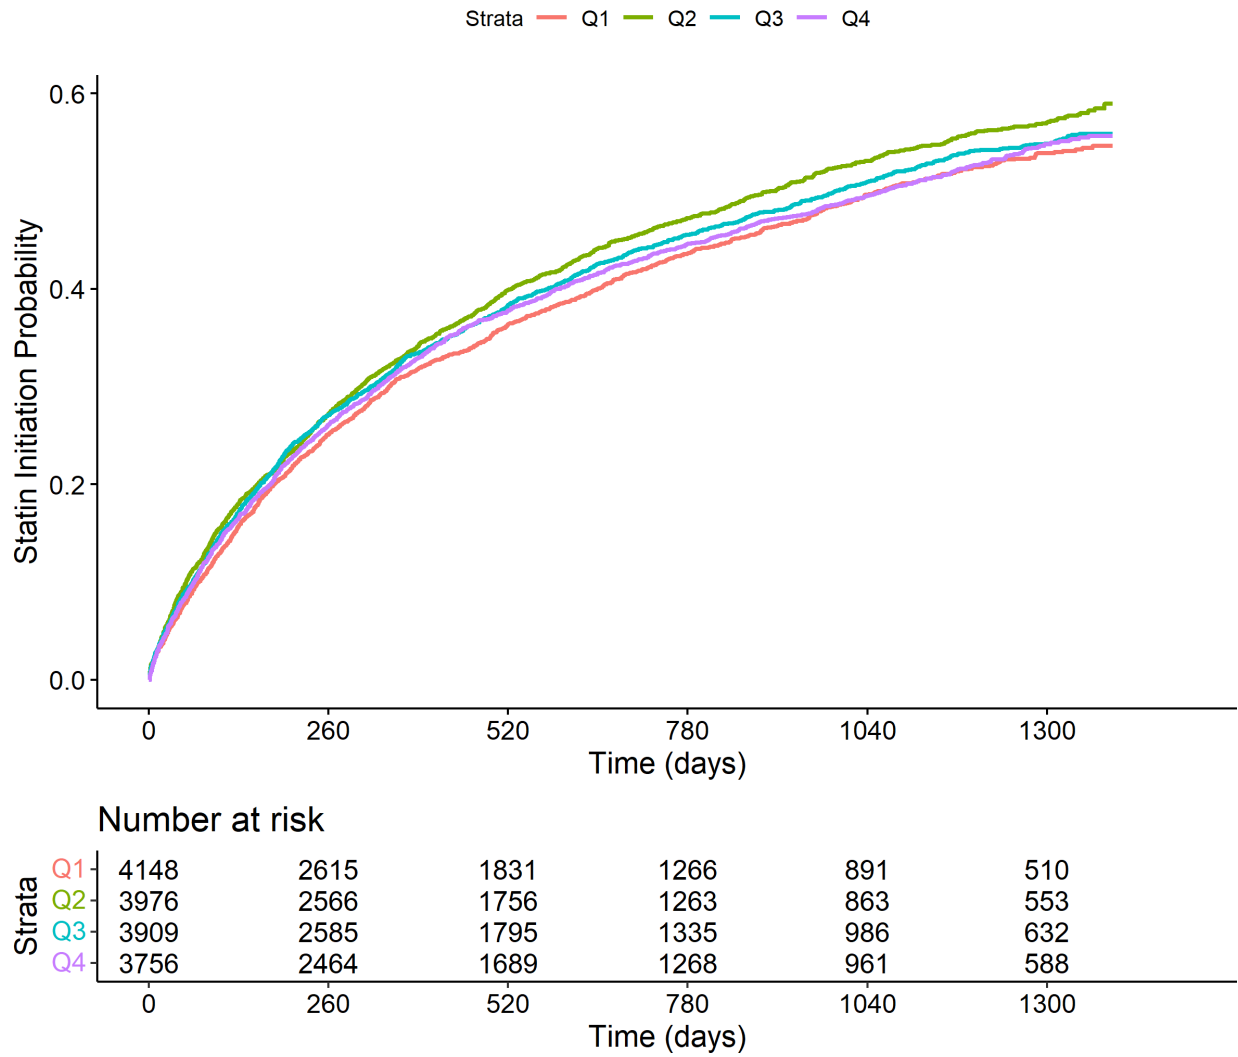

**eFigure 2. Cumulative incidence curve for statin initiation stratified by Q1 through Q4 of OOP costs for SGLT2i.**

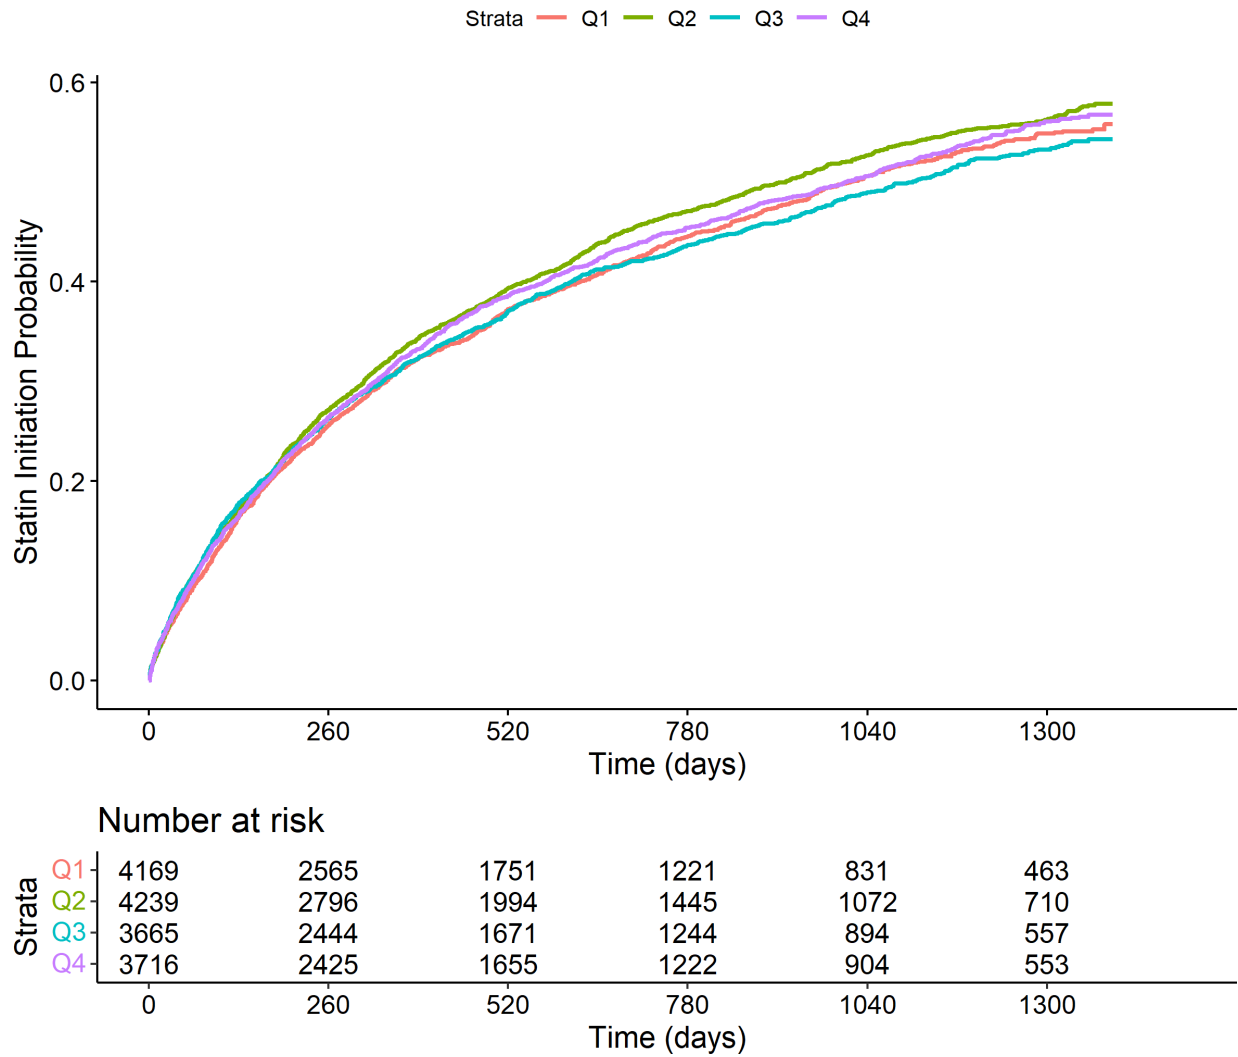

**eTable 8: Hazard ratio of initiating a statin comparing the highest versus the lowest quartile of OOP costs for GLP-1 receptor agonists or SGLT2 inhibitors.**

| Model # | Description of model adjustments | Statin initiation Hazard Ratio (95% Confidence Interval), Q4 vs Q1 OOP costs for GLP-1 agonists | Statin initiation Hazard Ratio (95% Confidence Interval), Q4 vs Q1 OOP Costs for SGLT2 inhibitors |
|---------|----------------------------------|-------------------------------------------------------------------------------------------------|---------------------------------------------------------------------------------------------------|
| 1       | Quartile of OOP costs only       | 1.04 (0.97 to 1.11)                                                                             | 1.04 (0.97 to 1.11)                                                                               |
| 2       | Model 1+demographics*            | 1.08 (1.01 to 1.16)                                                                             | 1.11 (1.04 to 1.19)                                                                               |
| 3       | Model 2+comorbidities**          | 1.09 (1.01 to 1.17)                                                                             | 1.12 (1.04 to 1.20)                                                                               |
| 4       | Model 3+insurance type           | 1.08 (1.01 to 1.16)                                                                             | 1.10 (1.03 to 1.18)                                                                               |
| 5       | Model 4+provider type            | 1.09 (1.01 to 1.17)                                                                             | 1.10 (1.03 to 1.19)                                                                               |
| 6       | Model 5+has HbA1c lab result     | 1.08 (1.01 to 1.16)                                                                             | 1.10 (1.03 to 1.18)                                                                               |

OOP = Out-of-pocket

\*age, gender, division, metformin fill year, education level, household income range, race

\*\*heart failure, hypertension, hyperlipidemia, chronic kidney disease, serious hypoglycemic events, serious hyperglycemic events, diabetic nephropathy, diabetic neuropathy, diabetic retinopathy, foot ulcers, end state renal disease, obesity, smoking status, unstable angina, peripheral artery disease, myocardial infarction, coronary artery bypass graft, Percutaneous coronary intervention, stroke
