# Supplementary material for: Evaluation of Out-of-Pocket Costs and Treatment Intensification With an SGLT2 Inhibitor or GLP-1 RA in Patients With Type 2 Diabetes and Cardiovascular Disease
Source: PubMed Central journal article supplement (PMC10261995; doi:10.1001/jamanetworkopen.2023.17886), 2023-06-12
Supplement: jamanetwopen-e2317886-s002.pdf [file jamanetwopen-e2317886-s002.pdf]

## **Data Sharing Statement**

### **Data**

**Data available:** No
